# Supplementary material for: Unravelling the Genetic Architecture of Rust Resistance in the Common Bean (Phaseolus vulgaris L.) by Combining QTL-Seq and GWAS Analysis
Source: MDPI journal article supplement (doi:10.3390/plants11070953), 2022-03-31
Supplement: s1 [file s1]

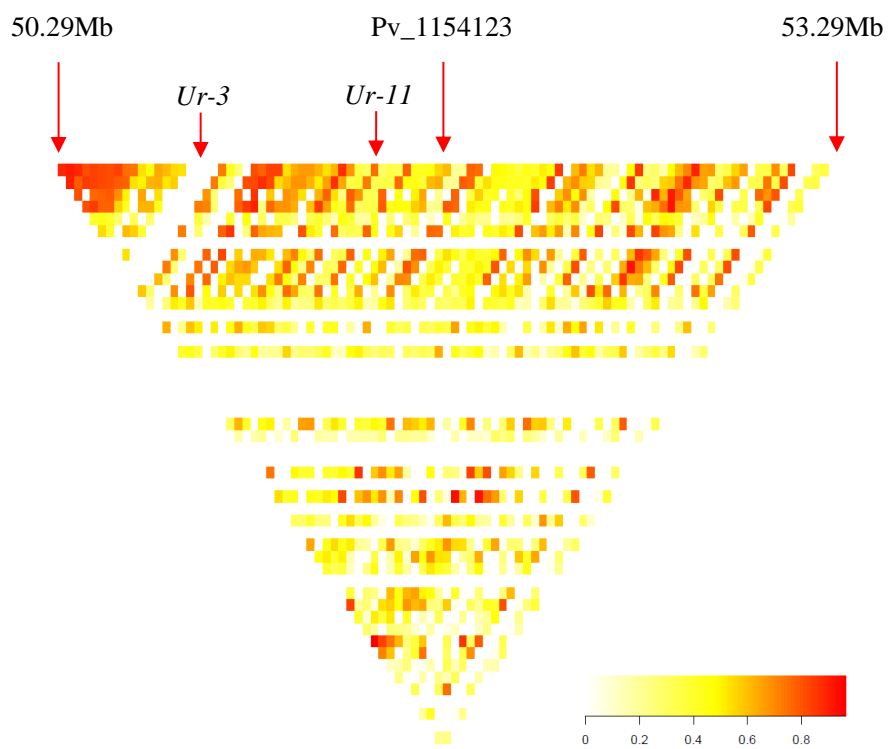

**Figure S1.** LD block analysis for GWAS in a 3Mb region on chromosome 11 surrounding *Pv\_1154123*.

**Table S1.** The detected SNPs associated with rust resistance.

| Marker     | Alleles | Chr | Pos      | LOD  | MarkerR <sup>2</sup> |
|------------|---------|-----|----------|------|----------------------|
| Pv_0007169 | G/A     | 1   | 5255328  | 3.86 | 0.29                 |
| Pv_0042869 | T/C     | 1   | 29333069 | 3.75 | 0.30                 |
| Pv_0053609 | T/C     | 1   | 35369449 | 3.74 | 0.23                 |
| Pv_0059685 | C/T     | 1   | 39798031 | 3.69 | 0.24                 |
| Pv_0103183 | A/G     | 2   | 13091351 | 3.65 | 0.30                 |
| Pv_0106805 | T/C     | 2   | 16229463 | 4.21 | 0.37                 |
| Pv_0167418 | C/A     | 2   | 37091191 | 3.66 | 0.37                 |
| Pv_0195528 | C/T     | 2   | 46754905 | 3.73 | 0.29                 |
| Pv_0226091 | T/C     | 3   | 12402262 | 3.63 | 0.22                 |
| Pv_0270792 | G/A     | 3   | 31067113 | 3.73 | 0.29                 |
| Pv_0319157 | T/G     | 4   | 21620447 | 3.70 | 0.20                 |
| Pv_0322658 | A/C     | 4   | 23777303 | 3.84 | 0.30                 |
| Pv_0325504 | G/A     | 4   | 25423069 | 3.53 | 0.24                 |
| Pv_0330640 | A/G     | 4   | 28533002 | 3.64 | 0.25                 |
| Pv_0339195 | C/T     | 4   | 33080600 | 3.96 | 0.23                 |
| Pv_0340041 | T/G     | 4   | 33564176 | 4.35 | 0.49                 |
| Pv_0346308 | C/T     | 4   | 37492669 | 3.94 | 0.26                 |
| Pv_0362334 | A/T     | 4   | 44224416 | 3.51 | 0.42                 |
| Pv_0365421 | C/T     | 4   | 45831727 | 3.50 | 0.25                 |
| Pv_0389986 | G/T     | 5   | 1484710  | 3.51 | 0.39                 |
| Pv_0434325 | G/C     | 5   | 17823775 | 3.78 | 0.24                 |
| Pv_0470869 | C/T     | 5   | 38200892 | 3.60 | 0.24                 |
| Pv_0481643 | G/A     | 6   | 3887133  | 4.10 | 0.25                 |
| Pv_0487816 | G/T     | 6   | 6404511  | 3.53 | 0.30                 |
| Pv_0494796 | G/A     | 6   | 9083082  | 3.87 | 0.38                 |
| Pv_0500403 | C/T     | 6   | 10563984 | 5.22 | 0.37                 |
| Pv_0502234 | C/T     | 6   | 11148336 | 3.74 | 0.23                 |
| Pv_0519503 | C/T     | 6   | 18253715 | 3.83 | 0.34                 |
| Pv_0551231 | T/G     | 7   | 8115339  | 3.59 | 0.44                 |
| Pv_0563869 | T/C     | 7   | 13837112 | 3.84 | 0.31                 |
| Pv_0582823 | G/A     | 7   | 20638356 | 3.64 | 0.24                 |
| Pv_0586296 | A/G     | 7   | 21953604 | 4.10 | 0.32                 |
| Pv_0696815 | A/G     | 8   | 16470214 | 3.72 | 0.30                 |
| Pv_0697529 | A/T     | 8   | 16958515 | 3.91 | 0.36                 |
| Pv_0703060 | C/T     | 8   | 20119136 | 5.06 | 0.40                 |
| Pv_0715047 | A/G     | 8   | 27492714 | 3.51 | 0.20                 |
| Pv_0721495 | G/C     | 8   | 31166278 | 3.68 | 0.24                 |
| Pv_0730128 | G/T     | 8   | 36454200 | 3.57 | 0.19                 |
| Pv_0735742 | C/T     | 8   | 39367308 | 4.22 | 0.42                 |
| Pv_0741200 | C/T     | 8   | 42546948 | 3.99 | 0.30                 |
| Pv_0758774 | G/A     | 8   | 54053506 | 3.94 | 0.28                 |
| Pv_0763806 | C/T     | 8   | 57065937 | 4.20 | 0.25                 |
| Pv_0800923 | T/C     | 9   | 5730696  | 3.68 | 0.25                 |
| Pv_0880724 | C/T     | 9   | 32733433 | 3.72 | 0.24                 |
| Pv_0891847 | C/A     | 10  | 1857652  | 3.68 | 0.22                 |
| Pv_0896772 | C/T     | 10  | 3381247  | 3.64 | 0.25                 |
| Pv_0926525 | G/A     | 10  | 9069039  | 3.72 | 0.36                 |
| Pv_0956402 | C/T     | 10  | 25344768 | 3.53 | 0.21                 |
| Pv_0965003 | A/T     | 10  | 30053446 | 3.68 | 0.31                 |
| Pv_0967464 | C/T     | 10  | 31420756 | 3.84 | 0.24                 |

|            |     |    |          |      |      |
|------------|-----|----|----------|------|------|
| Pv_0976693 | C/T | 10 | 35351399 | 3.67 | 0.32 |
| Pv_1020395 | A/G | 11 | 2576575  | 3.99 | 0.24 |
| Pv_1024889 | A/G | 11 | 7145667  | 4.09 | 0.29 |
| Pv_1062690 | C/T | 11 | 13494377 | 4.69 | 0.40 |
| Pv_1065991 | C/T | 11 | 14394903 | 3.78 | 0.25 |
| Pv_1066577 | T/C | 11 | 14911091 | 4.03 | 0.26 |
| Pv_1066951 | C/T | 11 | 15338720 | 3.72 | 0.28 |
| Pv_1071275 | G/A | 11 | 17387258 | 3.60 | 0.26 |
| Pv_1077437 | C/T | 11 | 21225408 | 3.51 | 0.27 |
| Pv_1087343 | G/T | 11 | 26988514 | 4.28 | 0.27 |
| Pv_1105821 | G/T | 11 | 36927826 | 4.07 | 0.31 |
| Pv_1112397 | G/A | 11 | 40485920 | 3.85 | 0.28 |
| Pv_1128041 | A/G | 11 | 47173150 | 3.98 | 0.40 |
| Pv_1154123 | A/C | 11 | 51791479 | 3.58 | 0.27 |

---

**Table S2.** Putative candidate genes in the QTLs regions and surrounding to the detected SNPs.

| QTL/loci | Gene ID         | Chr  | Start   | End     | Annotation                                                           |
|----------|-----------------|------|---------|---------|----------------------------------------------------------------------|
| Qur-1    | Phvul.004G17570 | Chr0 | 4783806 | 4784202 | Protein kinase family protein with leucine-rich repeat domain        |
|          | 0               | 4    | 6       | 1       |                                                                      |
|          | Phvul.004G17580 | Chr0 | 4784434 | 4784839 | Protein kinase family protein with leucine-rich repeat domain        |
|          | 0               | 4    | 0       | 8       |                                                                      |
|          | Phvul.004G17590 | Chr0 | 4785316 | 4785696 | Protein kinase family protein with leucine-rich repeat domain        |
|          | 0               | 4    | 8       | 0       |                                                                      |
| Qur-2    | Phvul.004G17790 | Chr0 | 4798534 | 4798899 | Leucine-rich repeat protein kinase family protein                    |
|          | 0               | 4    | 4       | 7       |                                                                      |
|          | Phvul.005G02720 | Chr0 | 2531034 | 2534630 | NB-ARC domain-containing disease resistance protein                  |
|          | 0               | 5    |         |         |                                                                      |
|          | Phvul.005G03120 | Chr0 | 2895711 | 2899880 | LRR and NB-ARC domains-containing disease resistance protein         |
|          | 0               | 5    |         |         |                                                                      |
|          | Phvul.005G03240 | Chr0 | 2993278 | 2993718 | Disease resistance-responsive (dirigent-like protein) family protein |
|          | 0               | 5    |         |         |                                                                      |
|          | Phvul.005G03250 | Chr0 | 3004781 | 3005350 | Disease resistance-responsive (dirigent-like protein) family protein |
|          | 0               | 5    |         |         |                                                                      |
|          | Phvul.005G03260 | Chr0 | 3005604 | 3006439 | Disease resistance-responsive (dirigent-like protein) family protein |
|          | 0               | 5    |         |         |                                                                      |
|          | Phvul.005G03270 | Chr0 | 3014210 | 3015142 | Disease resistance-responsive (dirigent-like protein) family protein |
|          | 0               | 5    |         |         |                                                                      |
| Qur-3    | Phvul.005G04430 | Chr0 | 4531267 | 4535376 | ABC transporter family protein                                       |
|          | 0               | 5    |         |         |                                                                      |
|          | Phvul.005G04440 | Chr0 | 4540585 | 4552159 | ABC transporter family protein                                       |
|          | 0               | 5    |         |         |                                                                      |
|          | Phvul.006G05150 | Chr0 | 1562513 | 1562820 | NB-ARC domain-containing disease resistance protein                  |
|          | 0               | 6    | 0       | 1       |                                                                      |
|          | Phvul.006G05230 | Chr0 | 1568713 | 1569048 | NB-ARC domain-containing disease resistance protein                  |
|          | 0               | 6    | 7       | 1       |                                                                      |
|          | Phvul.006G05240 | Chr0 | 1569703 | 1570128 | NB-ARC domain-containing disease resistance protein                  |
|          | 0               | 6    | 9       | 9       |                                                                      |

|      |                 |      |         |         |                                                     |
|------|-----------------|------|---------|---------|-----------------------------------------------------|
| GWAS | Phvul.006G05250 | Chr0 | 1571564 | 1571831 | NB-ARC domain-containing disease resistance protein |
|      | 0               | 6    | 2       | 4       |                                                     |
|      | Phvul.006G05260 | Chr0 | 1573426 | 1574489 | NB-ARC domain-containing disease resistance protein |
|      | 0               | 6    | 5       | 1       |                                                     |
|      | Phvul.006G05650 | Chr0 | 1632353 | 1632564 | NB-ARC domain-containing disease resistance protein |
|      | 0               | 6    | 0       | 2       |                                                     |
|      | Phvul.001G04710 | Chr0 | 4955650 | 4961025 | Protein kinase superfamily protein                  |
|      | 0               | 1    |         |         |                                                     |
|      | Phvul.001G04790 | Chr0 | 5042113 | 5046099 | Protein kinase superfamily protein                  |
|      | 0               | 1    |         |         |                                                     |
|      | Phvul.001G04805 | Chr0 | 5065951 | 5077978 | Protein kinase superfamily protein                  |
|      | 0               | 1    |         |         |                                                     |
|      | Phvul.001G04820 | Chr0 | 5092278 | 5094941 | Protein kinase superfamily protein                  |
|      | 0               | 1    |         |         |                                                     |
|      | Phvul.001G04830 | Chr0 | 5098055 | 5098405 | Protein kinase superfamily protein                  |
|      | 0               | 1    |         |         |                                                     |
|      | Phvul.001G04860 | Chr0 | 5137894 | 5140798 | Protein kinase superfamily protein                  |
|      | 0               | 1    |         |         |                                                     |
|      | Phvul.001G04870 | Chr0 | 5156426 | 5162916 | Protein kinase superfamily protein                  |
|      | 1               | 1    |         |         |                                                     |
|      | Phvul.001G04880 | Chr0 | 5168435 | 5171461 | Protein kinase superfamily protein                  |
|      | 0               | 1    |         |         |                                                     |
|      | Phvul.001G04890 | Chr0 | 5216094 | 5222823 | Protein kinase superfamily protein                  |
|      | 0               | 1    |         |         |                                                     |
|      | Phvul.001G04900 | Chr0 | 5251883 | 5254873 | Protein kinase superfamily protein                  |
|      | 0               | 1    |         |         |                                                     |
|      | Phvul.001G04910 | Chr0 | 5266820 | 5270057 | Protein kinase superfamily protein                  |
|      | 1               | 1    |         |         |                                                     |
|      | Phvul.001G04930 | Chr0 | 5286093 | 5287952 | Protein kinase superfamily protein                  |
|      | 0               | 1    |         |         |                                                     |
|      | Phvul.001G05070 | Chr0 | 5481456 | 5489717 | Protein kinase superfamily protein                  |
|      | 0               | 1    |         |         |                                                     |
|      | Phvul.001G11510 | Chr0 | 2938932 | 2939571 | Leucine-rich repeat protein kinase family protein   |
|      | 0               | 1    | 9       | 2       |                                                     |

|                 |      |         |         |                                                          |
|-----------------|------|---------|---------|----------------------------------------------------------|
| Phvul.001G12820 | Chr0 | 3556811 | 3557545 | disease resistance protein (TIR-NBS-LRR class), putative |
| 0               | 1    | 9       | 2       |                                                          |
| Phvul.002G29560 | Chr0 | 4647049 | 4647486 | Leucine-rich repeat protein kinase family protein        |
| 0               | 2    | 6       | 0       |                                                          |
| Phvul.002G29770 | Chr0 | 4662439 | 4662945 | Leucine-rich repeat (LRR) family protein                 |
| 0               | 2    | 7       | 2       |                                                          |
| Phvul.002G30190 | Chr0 | 4698657 | 4699280 | Protein kinase superfamily protein                       |
| 0               | 2    | 1       | 2       |                                                          |
| Phvul.004G09990 | Chr0 | 3366191 | 3366561 | disease resistance family protein / LRR family protein   |
| 0               | 4    | 4       | 2       |                                                          |
| Phvul.004G10000 | Chr0 | 3368776 | 3369107 | disease resistance family protein / LRR family protein   |
| 0               | 4    | 5       | 9       |                                                          |
| Phvul.004G10001 | Chr0 | 3369635 | 3370837 | disease resistance family protein / LRR family protein   |
| 4               | 4    | 2       | 3       |                                                          |
| Phvul.004G10020 | Chr0 | 3372898 | 3373249 | disease resistance family protein / LRR family protein   |
| 0               | 4    | 3       | 6       |                                                          |
| Phvul.004G10030 | Chr0 | 3377978 | 3378269 | disease resistance family protein / LRR family protein   |
| 0               | 4    | 2       | 5       |                                                          |
| Phvul.004G10300 | Chr0 | 3350115 | 3350613 | disease resistance family protein / LRR family protein   |
| 0               | 4    | 4       | 9       |                                                          |
| Phvul.004G10320 | Chr0 | 3344567 | 3344840 | disease resistance family protein / LRR family protein   |
| 0               | 4    | 0       | 0       |                                                          |
| Phvul.004G10330 | Chr0 | 3333792 | 3334147 | disease resistance family protein / LRR family protein   |
| 0               | 4    | 6       | 2       |                                                          |
| Phvul.004G10360 | Chr0 | 3308861 | 3309395 | disease resistance family protein / LRR family protein   |
| 0               | 4    | 8       | 5       |                                                          |
| Phvul.004G13970 | Chr0 | 4394871 | 4395266 | Disease resistance protein (TIR-NBS-LRR class) family    |
| 0               | 4    | 2       | 4       |                                                          |
| Phvul.004G13980 | Chr0 | 4396677 | 4397065 | disease resistance protein (TIR-NBS-LRR class), putative |
| 0               | 4    | 8       | 4       |                                                          |
| Phvul.004G13990 | Chr0 | 4397923 | 4398972 | disease resistance protein (TIR-NBS-LRR class), putative |
| 0               | 4    | 6       | 8       |                                                          |
| Phvul.004G14010 | Chr0 | 4399643 | 4400047 | disease resistance protein (TIR-NBS-LRR class), putative |
| 0               | 4    | 1       | 2       |                                                          |

|                 |      |         |         |                                                          |
|-----------------|------|---------|---------|----------------------------------------------------------|
| Phvul.004G14040 | Chr0 | 4402393 | 4402600 | disease resistance protein (TIR-NBS-LRR class), putative |
| 0               | 4    | 1       | 0       |                                                          |
| Phvul.004G14050 | Chr0 | 4402876 | 4403604 | disease resistance protein (TIR-NBS-LRR class), putative |
| 0               | 4    | 4       | 8       |                                                          |
| Phvul.004G14070 | Chr0 | 4404330 | 4404728 | disease resistance protein (TIR-NBS-LRR class), putative |
| 0               | 4    | 2       | 7       |                                                          |
| Phvul.004G14080 | Chr0 | 4405365 | 4405773 | disease resistance protein (TIR-NBS-LRR class), putative |
| 0               | 4    | 6       | 6       |                                                          |
| Phvul.004G15450 | Chr0 | 4579971 | 4580409 | Protein kinase superfamily protein                       |
| 0               | 4    | 0       | 6       |                                                          |
| Phvul.004G15460 | Chr0 | 4581909 | 4582345 | Protein kinase superfamily protein                       |
| 0               | 4    | 0       | 7       |                                                          |
| Phvul.004G15470 | Chr0 | 4582694 | 4582785 | Protein kinase superfamily protein                       |
| 0               | 4    | 8       | 0       |                                                          |
| Phvul.004G15480 | Chr0 | 4582989 | 4583986 | Protein kinase superfamily protein                       |
| 0               | 4    | 3       | 8       |                                                          |
| Phvul.004G15560 | Chr0 | 4593919 | 4594392 | Protein kinase superfamily protein                       |
| 0               | 4    | 0       | 1       |                                                          |
| Phvul.004G15580 | Chr0 | 4595570 | 4596086 | Protein kinase superfamily protein                       |
| 0               | 4    | 7       | 0       |                                                          |
| Phvul.005G01420 | Chr0 | 1337185 | 1343069 | NB-ARC domain-containing disease resistance protein      |
| 0               | 5    |         |         |                                                          |
| Phvul.005G01470 | Chr0 | 1227809 | 1232595 | NB-ARC domain-containing disease resistance protein      |
| 1               | 5    |         |         |                                                          |
| Phvul.005G01650 | Chr0 | 1443971 | 1449481 | disease resistance protein (TIR-NBS-LRR class), putative |
| 0               | 5    |         |         |                                                          |
| Phvul.005G01700 | Chr0 | 1475070 | 1480689 | Protein kinase superfamily protein                       |
| 0               | 5    |         |         |                                                          |
| Phvul.005G07880 | Chr0 | 1757984 | 1758166 | Leucine-rich repeat transmembrane protein kinase         |
| 0               | 5    | 5       | 6       |                                                          |
| Phvul.005G07890 | Chr0 | 1802652 | 1804934 | Leucine-rich repeat transmembrane protein kinase         |
| 0               | 5    | 9       | 6       |                                                          |
| Phvul.005G07900 | Chr0 | 1801015 | 1801116 | Leucine-rich repeat transmembrane protein kinase         |
| 0               | 5    | 2       | 3       |                                                          |

|                 |      |         |         |                                                                             |
|-----------------|------|---------|---------|-----------------------------------------------------------------------------|
| Phvul.005G07910 | Chr0 | 1778729 | 1780055 | Leucine-rich repeat transmembrane protein kinase                            |
| 0               | 5    | 4       | 4       |                                                                             |
| Phvul.006G01390 | Chr0 | 6487721 | 6489838 | ABC-2 type transporter family protein                                       |
| 0               | 6    |         |         |                                                                             |
| Phvul.006G01990 | Chr0 | 4036094 | 4050882 | Protein kinase protein with adenine nucleotide alpha hydrolases-like domain |
| 0               | 6    |         |         |                                                                             |
| Phvul.006G02900 | Chr0 | 1099759 | 1100216 | Leucine-rich receptor-like protein kinase family protein                    |
| 0               | 6    | 4       | 1       |                                                                             |
| Phvul.006G07160 | Chr0 | 1840554 | 1841112 | Leucine-rich repeat protein kinase family protein                           |
| 0               | 6    | 1       | 2       |                                                                             |
| Phvul.006G07230 | Chr0 | 1850520 | 1850924 | Protein kinase superfamily protein                                          |
| 0               | 6    | 3       | 1       |                                                                             |
| Phvul.007G08250 | Chr0 | 8284534 | 8286019 | Protein kinase superfamily protein                                          |
| 0               | 7    |         |         |                                                                             |
| Phvul.007G08290 | Chr0 | 8322409 | 8327233 | Protein kinase superfamily protein                                          |
| 0               | 7    |         |         |                                                                             |
| Phvul.007G11210 | Chr0 | 2045785 | 2046104 | Leucine-rich repeat protein kinase family protein                           |
| 0               | 7    | 8       | 6       |                                                                             |
| Phvul.008G12270 | Chr0 | 1708529 | 1710346 | Protein kinase superfamily protein with octicosapeptide/Phox/Bem1p domain   |
| 0               | 8    | 1       | 1       |                                                                             |
| Phvul.008G12420 | Chr0 | 1675558 | 1675782 | Protein kinase superfamily protein                                          |
| 0               | 8    | 2       | 7       |                                                                             |
| Phvul.008G19482 | Chr0 | 5380815 | 5381755 | Disease resistance protein (TIR-NBS-LRR class) family                       |
| 8               | 8    | 0       | 7       |                                                                             |
| Phvul.008G19490 | Chr0 | 5383414 | 5383807 | disease resistance protein (TIR-NBS-LRR class), putative                    |
| 0               | 8    | 5       | 1       |                                                                             |
| Phvul.008G19500 | Chr0 | 5384659 | 5384709 | Disease resistance protein (TIR-NBS-LRR class) family                       |
| 0               | 8    | 3       | 0       |                                                                             |
| Phvul.008G19510 | Chr0 | 5387267 | 5388136 | disease resistance protein (TIR-NBS-LRR class), putative                    |
| 0               | 8    | 1       | 2       |                                                                             |
| Phvul.008G19521 | Chr0 | 5390158 | 5391858 | disease resistance protein (TIR-NBS-LRR class), putative                    |
| 4               | 8    | 9       | 2       |                                                                             |
| Phvul.008G22190 | Chr0 | 5708466 | 5708878 | Leucine-rich repeat protein kinase family protein                           |
| 0               | 8    | 3       | 0       |                                                                             |



|                 |      |         |         |                                                              |
|-----------------|------|---------|---------|--------------------------------------------------------------|
| Phvul.008G22370 | Chr0 | 5736197 | 5736707 | Protein kinase superfamily protein                           |
| 0               | 8    | 6       | 9       |                                                              |
| Phvul.009G02380 | Chr0 | 5776422 | 5780992 | Leucine-rich repeat protein kinase family protein            |
| 0               | 9    |         |         |                                                              |
| Phvul.009G02390 | Chr0 | 5796347 | 5799960 | Protein kinase superfamily protein                           |
| 0               | 9    |         |         |                                                              |
| Phvul.009G02420 | Chr0 | 5901826 | 5905756 | Protein kinase superfamily protein                           |
| 0               | 9    |         |         |                                                              |
| Phvul.010G02310 | Chr1 | 3272172 | 3280327 | LRR and NB-ARC domains-containing disease resistance protein |
| 0               | 0    |         |         |                                                              |
| Phvul.010G02320 | Chr1 | 3283510 | 3296126 | LRR and NB-ARC domains-containing disease resistance protein |
| 0               | 0    |         |         |                                                              |
| Phvul.010G02350 | Chr1 | 3306753 | 3310882 | Disease resistance protein (TIR-NBS-LRR class) family        |
| 0               | 0    |         |         |                                                              |
| Phvul.010G02360 | Chr1 | 3315963 | 3326616 | Protein kinase superfamily protein                           |
| 0               | 0    |         |         |                                                              |
| Phvul.010G02400 | Chr1 | 3382255 | 3384686 | Disease resistance protein (TIR-NBS-LRR class) family        |
| 0               | 0    |         |         |                                                              |
| Phvul.010G02410 | Chr1 | 3388367 | 3391870 | Disease resistance protein (TIR-NBS-LRR class) family        |
| 0               | 0    |         |         |                                                              |
| Phvul.010G02420 | Chr1 | 3404232 | 3407834 | Disease resistance protein (TIR-NBS-LRR class) family        |
| 0               | 0    |         |         |                                                              |
| Phvul.010G02425 | Chr1 | 3412387 | 3416106 | Disease resistance protein (TIR-NBS-LRR class) family        |
| 0               | 0    |         |         |                                                              |
| Phvul.010G02430 | Chr1 | 3434532 | 3438142 | Disease resistance protein (TIR-NBS-LRR class) family        |
| 1               | 0    |         |         |                                                              |
| Phvul.010G02435 | Chr1 | 3445959 | 3449123 | Disease resistance protein (TIR-NBS-LRR class) family        |
| 1               | 0    |         |         |                                                              |
| Phvul.010G02500 | Chr1 | 3647546 | 3654388 | Disease resistance protein (TIR-NBS-LRR class) family        |
| 0               | 0    |         |         |                                                              |
| Phvul.010G02510 | Chr1 | 3666324 | 3671253 | NB-ARC domain-containing disease resistance protein          |
| 0               | 0    |         |         |                                                              |
| Phvul.010G05815 | Chr1 | 9178648 | 9190498 | Protein kinase superfamily protein                           |
| 0               | 0    |         |         |                                                              |

|                 |      |         |         |                                                              |
|-----------------|------|---------|---------|--------------------------------------------------------------|
| Phvul.010G06830 | Chr1 | 2996674 | 2997381 | Protein kinase superfamily protein                           |
| 0               | 0    | 6       | 3       |                                                              |
| Phvul.010G07040 | Chr1 | 3128721 | 3129033 | Leucine-rich repeat protein kinase family protein            |
| 0               | 0    | 1       | 8       |                                                              |
| Phvul.010G09190 | Chr1 | 3530614 | 3531034 | NB-ARC domain-containing disease resistance protein          |
| 0               | 0    | 0       | 1       |                                                              |
| Phvul.010G09270 | Chr1 | 3513779 | 3514151 | Protein kinase superfamily protein                           |
| 0               | 0    | 9       | 3       |                                                              |
| Phvul.011G02880 | Chr1 | 2612121 | 2615929 | Leucine-rich repeat (LRR) family protein                     |
| 0               | 1    |         |         |                                                              |
| Phvul.011G03000 | Chr1 | 2721518 | 2726069 | disease resistance protein (TIR-NBS-LRR class), putative     |
| 0               | 1    |         |         |                                                              |
| Phvul.011G07480 | Chr1 | 6969389 | 6974063 | LRR and NB-ARC domains-containing disease resistance protein |
| 0               | 1    |         |         |                                                              |
| Phvul.011G16610 | Chr1 | 4700320 | 4700554 | NB-ARC domain-containing disease resistance protein          |
| 0               | 1    | 6       | 2       |                                                              |
| Phvul.011G16780 | Chr1 | 4727245 | 4728450 | Leucine-rich repeat transmembrane protein kinase             |
| 0               | 1    | 6       | 3       |                                                              |
| Phvul.011G20030 | Chr1 | 5153594 | 5153982 | NB-ARC domain-containing disease resistance protein          |
| 0               | 1    | 4       | 5       |                                                              |
| Phvul.011G20040 | Chr1 | 5154076 | 5154418 | Protein kinase superfamily protein                           |
| 0               | 1    | 1       | 6       |                                                              |
| Phvul.011G20080 | Chr1 | 5156959 | 5157403 | LRR and NB-ARC domains-containing disease resistance protein |
| 0               | 1    | 5       | 2       |                                                              |
| Phvul.011G20082 | Chr1 | 5160347 | 5160719 | NB-ARC domain-containing disease resistance protein          |
| 0               | 1    | 0       | 8       |                                                              |
| Phvul.011G20084 | Chr1 | 5160920 | 5161834 | LRR and NB-ARC domains-containing disease resistance protein |
| 0               | 1    | 9       | 4       |                                                              |
| Phvul.011G20086 | Chr1 | 5161199 | 5161257 | NB-ARC domain-containing disease resistance protein          |
| 0               | 1    | 0       | 1       |                                                              |
| Phvul.011G20088 | Chr1 | 5162222 | 5162793 | LRR and NB-ARC domains-containing disease resistance protein |
| 0               | 1    | 1       | 9       |                                                              |
| Phvul.011G20090 | Chr1 | 5164172 | 5164566 | NB-ARC domain-containing disease resistance protein          |
| 0               | 1    | 8       | 3       |                                                              |

|                 |      |         |         |                                                              |
|-----------------|------|---------|---------|--------------------------------------------------------------|
| Phvul.011G20100 | Chr1 | 5165121 | 5165472 | LRR and NB-ARC domains-containing disease resistance protein |
| 0               | 1    | 3       | 3       |                                                              |
| Phvul.011G20110 | Chr1 | 5165947 | 5166049 | NB-ARC domain-containing disease resistance protein          |
| 1               | 1    | 8       | 7       |                                                              |
| Phvul.011G20190 | Chr1 | 5174220 | 5174420 | NB-ARC domain-containing disease resistance protein          |
| 0               | 1    | 8       | 7       |                                                              |
| Phvul.011G20210 | Chr1 | 5175493 | 5175904 | LRR and NB-ARC domains-containing disease resistance protein |
| 0               | 1    | 9       | 5       |                                                              |
| Phvul.011G20230 | Chr1 | 5179006 | 5179373 | NB-ARC domain-containing disease resistance protein          |
| 0               | 1    | 8       | 0       |                                                              |
| Phvul.011G20236 | Chr1 | 5179580 | 5179662 | NB-ARC domain-containing disease resistance protein          |
| 6               | 1    | 4       | 2       |                                                              |
| Phvul.011G20243 | Chr1 | 5179795 | 5179898 | LRR and NB-ARC domains-containing disease resistance protein |
| 2               | 1    | 9       | 1       |                                                              |
| Phvul.011G20260 | Chr1 | 5184185 | 5184293 | LRR and NB-ARC domains-containing disease resistance protein |
| 1               | 1    | 7       | 3       |                                                              |
| Phvul.011G20275 | Chr1 | 5184321 | 5184416 | LRR and NB-ARC domains-containing disease resistance protein |
| 0               | 1    | 2       | 2       |                                                              |
| Phvul.011G20280 | Chr1 | 5184482 | 5184558 | Disease resistance protein (TIR-NBS-LRR class) family        |
| 0               | 1    | 9       | 7       |                                                              |
| Phvul.011G20290 | Chr1 | 5184808 | 5185256 | LRR and NB-ARC domains-containing disease resistance protein |
| 0               | 1    | 3       | 4       |                                                              |
| Phvul.011G20296 | Chr1 | 5186543 | 5186929 | NB-ARC domain-containing disease resistance protein          |
| 6               | 1    | 2       | 0       |                                                              |
| Phvul.011G20303 | Chr1 | 5188873 | 5189261 | LRR and NB-ARC domains-containing disease resistance protein |
| 2               | 1    | 9       | 0       |                                                              |
| Phvul.011G20310 | Chr1 | 5189358 | 5189712 | LRR and NB-ARC domains-containing disease resistance protein |
| 0               | 1    | 2       | 6       |                                                              |

---

**Table S3.** The detailed information for the 88 accessions in the diversity panel.

| <b>Taxa</b> | <b>Name or ID</b>   | <b>Type</b> | <b>Origin</b>     |
|-------------|---------------------|-------------|-------------------|
| CB01        | 2017331074          | Landrace    | Zhejiang Province |
| CB02        | 2017332052          | Landrace    | Zhejiang Province |
| CB03        | 2017332063          | Landrace    | Zhejiang Province |
| CB04        | P330726033          | Landrace    | Zhejiang Province |
| CB05        | P330784011          | Landrace    | Zhejiang Province |
| CB06        | P330784026          | Landrace    | Zhejiang Province |
| CB07        | P331024004          | Landrace    | Zhejiang Province |
| CB08        | P330182016          | Landrace    | Zhejiang Province |
| CB09        | 2018332202          | Landrace    | Zhejiang Province |
| CB10        | 2018332092          | Landrace    | Zhejiang Province |
| CB11        | 2018332211          | Landrace    | Zhejiang Province |
| CB12        | 2018332213          | Landrace    | Zhejiang Province |
| CB13        | 2018332240          | Landrace    | Zhejiang Province |
| CB14        | 2018332424          | Landrace    | Zhejiang Province |
| CB15        | 2018332439          | Landrace    | Zhejiang Province |
| CB16        | 2018333210          | Landrace    | Zhejiang Province |
| CB17        | 2018333222          | Landrace    | Zhejiang Province |
| CB18        | P330781018          | Landrace    | Zhejiang Province |
| CB19        | P331124017          | Landrace    | Zhejiang Province |
| CB20        | 2018334327          | Landrace    | Zhejiang Province |
| CB21        | 2018334422          | Landrace    | Zhejiang Province |
| CB22        | 2018332052          | Landrace    | Zhejiang Province |
| CB23        | 2018331426          | Landrace    | Zhejiang Province |
| CB24        | 2018333243          | Landrace    | Zhejiang Province |
| CB25        | 2018334210          | Landrace    | Zhejiang Province |
| CB26        | 2018334411          | Landrace    | Zhejiang Province |
| CB27        | 2018332405          | Landrace    | Zhejiang Province |
| CB28        | 2019334498          | Landrace    | Zhejiang Province |
| CB29        | Sucaidou No.6       | Cultivar    | Jiangsu Province  |
| CB30        | Sucaidou No.7       | Cultivar    | Jiangsu Province  |
| CB31        | Sucaidou No.14      | Cultivar    | Jiangsu Province  |
| CB32        | Sucaidou No.16      | Cultivar    | Jiangsu Province  |
| CB33        | Zaobai No.12        | Cultivar    | Jiangsu Province  |
| CB34        | Zheyun No.9         | Cultivar    | Zhejiang Province |
| CB35        | Liyun No.3          | Cultivar    | Zhejiang Province |
| CB36        | Liyun No.2          | Cultivar    | Zhejiang Province |
| CB37        | Jifengyoudou        | Cultivar    | Jilin Province    |
| CB38        | Lvlianyoudou        | Cultivar    | Jilin Province    |
| CB39        | Lvlongyoudou        | Cultivar    | Jilin Province    |
| CB40        | Zaofengyoudou       | Cultivar    | Jilin Province    |
| CB41        | Lvsongyoudou        | Cultivar    | Jilin Province    |
| CB42        | Huangfeiyoudou      | Cultivar    | Jilin Province    |
| CB43        | Ecaidou No.1        | Cultivar    | Hubei Province    |
| CB44        | Jiangdacaidou No.1  | Cultivar    | Hubei Province    |
| CB45        | Jiangdacaidou No.2  | Cultivar    | Hubei Province    |
| CB46        | Shuangqingyouxiu    | Cultivar    | Jiangxi Province  |
| CB47        | Fengyou No.8        | Cultivar    | Jiangxi Province  |
| CB48        | Shuangqingyingxiong | Cultivar    | Jiangxi Province  |
| CB49        | Hongjinmajiadou     | Cultivar    | Jiangxi Province  |

|      |                       |          |                   |
|------|-----------------------|----------|-------------------|
| CB50 | Wushusijidou No.2     | Cultivar | Hubei Province    |
| CB51 | Wushusijidou No.3     | Cultivar | Hubei Province    |
| CB52 | Wushusijidou          | Cultivar | Hubei Province    |
| CB53 | Baiyindou             | Landrace | Zhejiang Province |
| CB54 | Baizimeidou           | Landrace | Zhejiang Province |
| CB55 | Chuanhongjiadou       | Landrace | Zhejiang Province |
| CB56 | Chunqiujiadouwang     | Landrace | Zhejiang Province |
| CB57 | Cuiyu                 | Landrace | Zhejiang Province |
| CB58 | Gaowensijidou         | Landrace | Zhejiang Province |
| CB59 | Hangzhoubaihuasijidou | Landrace | Zhejiang Province |
| CB60 | Heizhenzhu            | Landrace | Zhejiang Province |
| CB61 | Honghuabaijia         | Landrace | Zhejiang Province |
| CB62 | Honghuaqingjia        | Landrace | Zhejiang Province |
| CB63 | Honghuasijidou        | Landrace | Zhejiang Province |
| CB64 | Hongjinyuanjiajingdou | Landrace | Zhejiang Province |
| CB65 | Huazihonghuaqingjia   | Landrace | Zhejiang Province |
| CB66 | Jiamanjia             | Landrace | Zhejiang Province |
| CB67 | Jiadouwang            | Landrace | Zhejiang Province |
| CB68 | Jinlongwang           | Landrace | Zhejiang Province |
| CB69 | Jiulibai              | Landrace | Zhejiang Province |
| CB70 | Linansijidou          | Landrace | Zhejiang Province |
| CB71 | Lvlong                | Landrace | Zhejiang Province |
| CB72 | Maliyana              | Landrace | Zhejiang Province |
| CB73 | Manpenghong           | Landrace | Zhejiang Province |
| CB74 | Panansijidou          | Landrace | Zhejiang Province |
| CB75 | Wujinjiadouwang       | Landrace | Zhejiang Province |
| CB76 | Wujinlvdidou          | Landrace | Zhejiang Province |
| CB77 | Wujinlvjiadou         | Landrace | Zhejiang Province |
| CB78 | Wushuhezi             | Landrace | Zhejiang Province |
| CB79 | Wushuheizi            | Landrace | Zhejiang Province |
| CB80 | Xiaocunsijidou        | Landrace | Zhejiang Province |
| CB81 | Yidianhong            | Landrace | Zhejiang Province |
| CB82 | Yinmanjia             | Landrace | Zhejiang Province |
| CB83 | Yudouwang             | Landrace | Zhejiang Province |
| CB84 | Zheyun No.5           | Cultivar | Zhejiang Province |
| CB85 | Zhizu                 | Landrace | Zhejiang Province |
| CB86 | Zheyun No.3           | Cultivar | Zhejiang Province |
| CB87 | PVR95                 | Landrace | Jilin Province    |
| CB88 | PVR96                 | Landrace | Jilin Province    |

---
